# Supplementary material for: Prognostic Implication of Mitral Valve Disease and Its Progression in East Asian Patients With Hypertrophic Cardiomyopathy
Source: PubMed Central journal article supplement — J Am Heart Assoc. 2023 Jan 23;12(3):e024792. doi: 10.1161/JAHA.121.024792 (PMC9973656; doi:10.1161/jaha.121.024792), 2023-01-23
Supplement: JAH3-12-e024792-s001.pdf [file JAH3-12-e024792-s001.pdf]

## **SUPPLEMENTAL MATERIAL**

**Table S1. Baseline and echocardiographic characteristics of patients with presence of MR.**

| <b>Presence of MR</b>                     | <b>Total<br/>(n = 278)</b> | <b>Obstructive<br/>HCM<br/>(n = 59)</b> | <b>Non-obstructive<br/>HCM<br/>(n = 219)</b> | <b>P-<br/>value</b> |
|-------------------------------------------|----------------------------|-----------------------------------------|----------------------------------------------|---------------------|
| <b><i>Clinical variables</i></b>          |                            |                                         |                                              |                     |
| Age, years                                | 62.3±14.4                  | 57.0±15.8                               | 63.7±13.6                                    | 0.001               |
| Male sex, n (%)                           | 121 (43.5)                 | 25 (42.4)                               | 96 (43.8)                                    | 0.841               |
| BMI, kg/m <sup>2</sup>                    | 24.5±3.7                   | 24.5±3.4                                | 24.5±3.7                                     | 0.958               |
| Hypertension, n (%)                       | 129 (46.4)                 | 26 (44.1)                               | 103 (47.0)                                   | 0.685               |
| Diabetes mellitus, n (%)                  | 48 (17.3)                  | 8 (13.6)                                | 40 (18.3)                                    | 0.396               |
| Dyslipidemia, n (%)                       | 59 (21.2)                  | 12 (20.3)                               | 47 (21.5)                                    | 0.852               |
| CKD, n (%)                                | 19 (6.8)                   | 1 (1.7)                                 | 18 (8.2)                                     | 0.078               |
| Atrial fibrillation, n (%)                | 102 (36.7)                 | 14 (23.7)                               | 88 (40.2)                                    | 0.020               |
| CAD, n (%)                                | 35 (12.6)                  | 4 (6.8)                                 | 31 (14.2)                                    | 0.130               |
| Prior alcohol ablation, n (%)             | 1 (0.4)                    | 1 (1.7)                                 | 0 (0.0)                                      | 0.054               |
| <b><i>Medications</i></b>                 |                            |                                         |                                              |                     |
| RAAS blockers, n (%)                      | 102 (36.7)                 | 17 (28.8)                               | 85 (38.8)                                    | 0.157               |
| Beta-blockers, n (%)                      | 151 (54.3)                 | 39 (66.1)                               | 112 (51.1)                                   | 0.041               |
| CCBs, n (%)                               | 118 (42.4)                 | 28 (47.5)                               | 90 (41.1)                                    | 0.380               |
| Diuretics, n (%)                          | 67 (24.1)                  | 6 (10.2)                                | 61 (27.9)                                    | 0.005               |
| Statin, n (%)                             | 62 (22.3)                  | 14 (23.7)                               | 48 (21.9)                                    | 0.767               |
| Antiplatelet agents, n (%)                | 111 (39.9)                 | 18 (30.5)                               | 93 (42.5)                                    | 0.096               |
| Anticoagulants, n (%)                     | 54 (19.4)                  | 7 (11.9)                                | 47 (21.5)                                    | 0.098               |
| <b><i>Echocardiographic variables</i></b> |                            |                                         |                                              |                     |
| LVEDD, mm                                 | 48.1±6.4                   | 44.6±6.1                                | 49.1±6.2                                     | <0.001              |
| LVESD, mm                                 | 31.6±6.5                   | 27.4±4.7                                | 32.7±6.4                                     | <0.001              |
| LV maximal thickness, mm                  | 18.7±4.1                   | 20.3±5.5                                | 18.3±3.6                                     | 0.011               |
| IVS thickness, mm                         | 14.7±5.0                   | 17.8±5.7                                | 13.9±4.4                                     | <0.001              |
| PW thickness, mm                          | 10.7±2.1                   | 11.6±2.8                                | 10.5±1.9                                     | 0.007               |
| LVEF, %                                   | 68.4±9.9                   | 74.1±6.6                                | 66.9±10.1                                    | <0.001              |
| LA volume index, ml/m <sup>2</sup>        | 49.6±31.4                  | 47.4±16.2                               | 50.3±34.8                                    | 0.541               |
| E velocity, m/s                           | 72.4±22.9                  | 0.77±0.25                               | 0.71±0.22                                    | 0.108               |
| E/e'                                      | 17.5±7.3                   | 20.0±8.1                                | 16.8±6.9                                     | 0.003               |
| RVSP, mmHg                                | 31.8±9.2                   | 30.6±7.8                                | 32.0±9.5                                     | 0.372               |

MV abnormalities

|                    |           |           |           |        |
|--------------------|-----------|-----------|-----------|--------|
| SAM, n (%)         | 78 (28.1) | 56 (94.9) | 22 (10.0) | <0.001 |
| MV prolapse, n (%) | 23 (8.3)  | 3 (5.1)   | 20 (9.1)  | 0.316  |
| MAC, n (%)         | 57 (20.5) | 22 (37.3) | 35 (16.0) | <0.001 |

---

HCM, hypertrophic cardiomyopathy; BMI, body mass index; CKD, chronic kidney disease; CAD, coronary artery disease; RAAS, renin-angiotensin-aldosterone system; CCB, calcium channel blockers; NOAC, novel oral anticoagulants, LVEDD, left ventricular end-diastolic dimension; LVESD, left ventricular end-systolic dimension; IVS, interventricular septum; PW posterior wall, LVEF, left ventricular ejection fraction; LA, left atrium; E, mitral inflow early diastolic filling; E/e', ratio of early diastolic mitral inflow velocity to early diastolic mitral annular tissue velocity; RVSP, right ventricular systolic pressure

**Table S2. Prevalence of MR according to the MV structural abnormalities.**

|                       | <b>All<br/>(n=1185)</b> | <b>MAC (+)<br/>(n=154)</b> | <b>MAC (-)<br/>(n=1031)</b> | <b>P-value</b> | <b>MVP (+)<br/>(n=29)</b> | <b>MVP (-)<br/>(n=1156)</b> | <b>P-value</b> |
|-----------------------|-------------------------|----------------------------|-----------------------------|----------------|---------------------------|-----------------------------|----------------|
| MR, n (%)             | 278 (23.5)              | 57 (37.0)                  | 221 (21.4)                  | <0.001         | 23 (79.3)                 | 255 (22.1)                  | <0.001         |
| Significant MR, n (%) | 46 (3.9)                | 15 (9.7)                   | 31 (3.0)                    | <0.001         | 12 (41.4)                 | 34 (2.9)                    | <0.001         |

MR, mitral regurgitation; MV, mitral valve; MAC, mitral annular calcification, MVP, mitral valve prolapse

**Table S3. MV characteristics in patients with obstructive HCM with SAM.**

|                         | <b>All<br/>(n=97)</b> | <b>No intrinsic<br/>MV disease<br/>(n=66)</b> | <b>Combined intrinsic<br/>MV disease<br/>(n=31)</b> | <b>P-<br/>value</b> |
|-------------------------|-----------------------|-----------------------------------------------|-----------------------------------------------------|---------------------|
| MV prolapse, n (%)      | 3 (3.1)               | 0 (0.0)                                       | 3 (9.7)                                             | 0.010               |
| MAC, n (%)              | 28 (28.9)             | 0 (0.0)                                       | 28 (90.3)                                           | <0.001              |
| MR, n (%)               | 56 (57.7)             | 31 (47.0)                                     | 25 (80.6)                                           | 0.001               |
| Mild                    | 40 (41.2)             | 26 (39.4)                                     | 14 (45.2)                                           |                     |
| Moderate                | 13 (13.4)             | 4 (6.1)                                       | 9 (29.0)                                            |                     |
| Severe                  | 3 (3.1)               | 1 (1.5)                                       | 2 (6.5)                                             |                     |
| Significant MR, n (%)   | 16 (16.5)             | 5 (7.6)                                       | 11 (35.5)                                           | 0.001               |
| Clinical outcome, n (%) | 23 (23.7)             | 16 (24.2)                                     | 7 (22.6)                                            | 0.858               |

MV, mitral valve; MAC, mitral annular calcification; MR, mitral regurgitation; MS, mitral stenosis
